# Supplementary material
Source: PubMed Central journal article supplement (PMC10284061)
Supplement: NIHMS1901308-supplement-Supplementary_Figures_and_Tables.pdf [file NIHMS1901308-supplement-Supplementary_Figures_and_Tables.pdf]

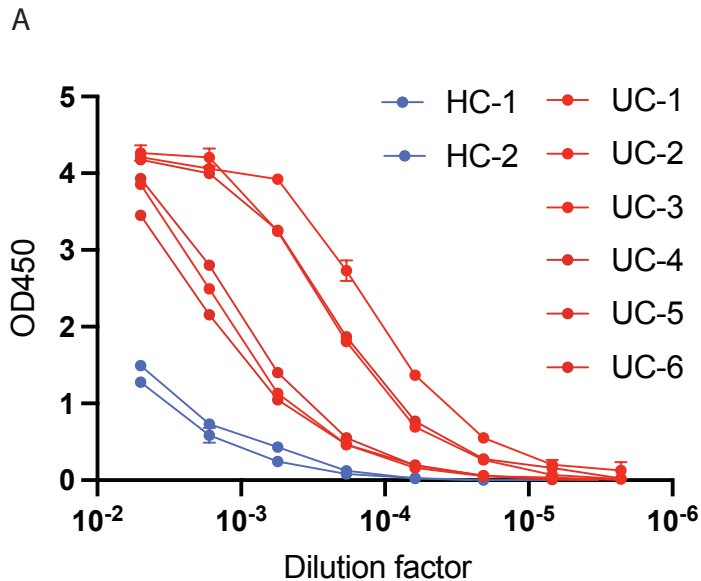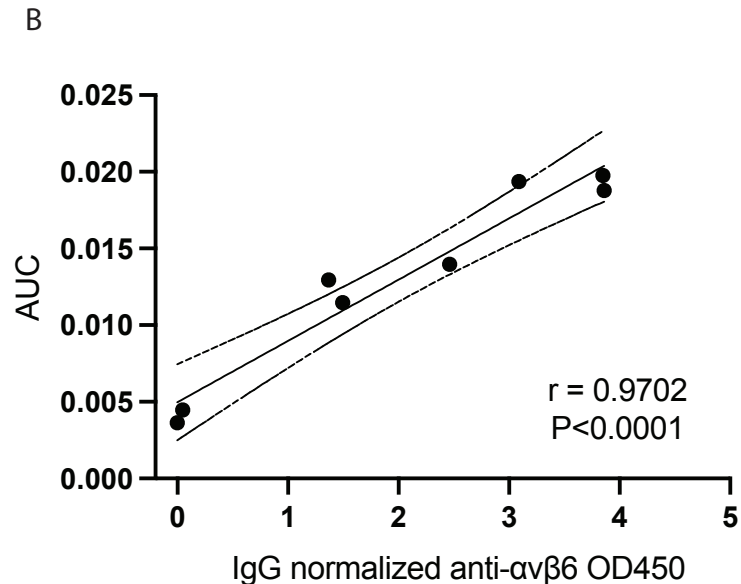

**Supplementary Figure 1: A. Anti-integrin  $\alpha$ v $\beta$ 6 IgG dilution curves in UC patients and normal volunteers. B. Pearson's correlation between IgG normalized OD450 anti- $\alpha$ v $\beta$ 6 values and area under the curve (AUC) from dilution curves shown in A.**

**Supplementary Table 1: Conditional logistic regression models comparing anti- $\alpha$ v $\beta$ 6 at each sample timepoint in those that developed UC compared to matched controls.**

|                                     | OR    | CI 95% (lower) | CI 95% (upper) | P value |
|-------------------------------------|-------|----------------|----------------|---------|
| Sample A anti- $\alpha$ v $\beta$ 6 | 4.94  | 2.16           | 11.30          | 0.0002  |
| Sample B anti- $\alpha$ v $\beta$ 6 | 24.88 | 4.22           | 146.75         | 0.0004  |
| Sample C anti- $\alpha$ v $\beta$ 6 | 6.90  | 2.21           | 21.56          | 0.0009  |
| Sample D anti- $\alpha$ v $\beta$ 6 | 23.99 | 3.37           | 170.82         | 0.0015  |

OR = Odds Ratio, CI = confidence interval

**Supplementary Table 2: Multivariate logistic regression model where ulcerative colitis status was modeled as function of anti- $\alpha$ v $\beta$ 6 and multiple covariates such as age, sex and race based in the COMPASS cohort.**

|                            | OR    | CI 95% (lower) | CI 95% (upper) | P value |
|----------------------------|-------|----------------|----------------|---------|
| Sex [ref: Male] Female     | 1.04  | 0.15           | 7.02           | 0.97    |
| Age                        | 0.91  | 0.84           | 0.99           | 0.03    |
| Race [ref: White] Asian    | 0.17  | 0.0005         | 57.19          | 0.55    |
| Race [ref: White] Black    | 0.42  | 0.03           | 5.52           | 0.51    |
| Race [ref: White] Other    | 0.50  | 0.06           | 4.21           | 0.52    |
| Anti- $\alpha$ v $\beta$ 6 | 64.05 | 7.41           | 553.74         | 0.0002  |

OR = Odds Ratio, CI = confidence interval

**Supplementary Table 3: Multivariate logistic regression model where ulcerative colitis status was modeled as function of anti- $\alpha$ v $\beta$ 6 and multiple covariates such as age, sex and race based in the OSCCAR cohort.**

|                            | OR     | CI 95% (lower) | CI 95% (upper) | P value |
|----------------------------|--------|----------------|----------------|---------|
| Sex [ref: Male] Female     | 2.93   | 0.80           | 10.70          | 0.10    |
| Age                        | 1.00   | 0.96           | 1.03           | 0.86    |
| Race [ref: White] Asian    | 0.00   | 0.00           | Infinity       | 0.99    |
| Race [ref: White] Black    | 0.03   | 0.00           | 0.33           | 0.005   |
| Race [ref: White] Other    | 0.02   | 0.00           | 0.43           | 0.01    |
| Anti- $\alpha$ v $\beta$ 6 | 156.29 | 12.53          | 1949.04        | 0.0001  |

OR = Odds Ratio, CI = confidence interval

**Supplementary Table 4: Cox regression time to composite event with covariate of anti- $\alpha$ v $\beta$ 6 in COMPASS cohort.**

| <b>Model 1</b>                     |      |                |                |         |
|------------------------------------|------|----------------|----------------|---------|
| Variable                           | HR   | CI 95% (lower) | CI 95% (upper) | P value |
| anti- $\alpha$ v $\beta$ 6         | 1.39 | 1.03           | 1.89           | 0.03    |
| Age                                | 0.99 | 0.96           | 1.02           | 0.37    |
| <b>Model 2</b>                     |      |                |                |         |
| anti- $\alpha$ v $\beta$ 6         | 1.35 | 0.99           | 1.85           | 0.06    |
| Age                                | 0.99 | 0.96           | 1.02           | 0.46    |
| Extensive disease at baseline (E3) | 1.45 | 0.68           | 3.09           | 0.33    |

**Supplementary Table 5: Cox regression time to composite event with covariate of anti- $\alpha\beta6$  in the OSCCAR cohort.**

| Variable                           | HR   | CI 95% (lower) | CI 95% (upper) | P value |
|------------------------------------|------|----------------|----------------|---------|
| anti- $\alpha\beta6$               | 1.24 | 1.01           | 1.53           | 0.04    |
| Age <40 years old at diagnosis     | 1.05 | 0.57           | 1.95           | 0.87    |
| Extensive disease at baseline (E3) | 1.23 | 0.66           | 2.28           | 0.52    |
| ESR elevation at baseline          | 0.70 | 0.32           | 1.53           | 0.38    |
| CRP elevation at baseline          | 0.39 | 0.12           | 1.27           | 0.12    |
| Steroids at baseline               | 1.64 | 0.84           | 3.23           | 0.15    |
| Focal ulcers on baseline endoscopy | 3.39 | 0.91           | 12.65          | 0.07    |
| Hospitalization at diagnosis       | 1.27 | 0.59           | 2.76           | 0.54    |

**Supplementary Table 6: Cox regression time to composite event with covariate of pANCA in the OSCCAR cohort**

| Variable                           | HR   | CI 95% (lower) | CI 95% (upper) | P value |
|------------------------------------|------|----------------|----------------|---------|
| anti- $\alpha\beta6$               | 1.28 | 1.02           | 1.62           | 0.04    |
| pANCA                              | 0.75 | 0.36           | 1.54           | 0.43    |
| Age <40 years old at diagnosis     | 1.10 | 0.59           | 2.05           | 0.76    |
| Extensive disease at baseline (E3) | 1.18 | 0.63           | 2.19           | 0.61    |
| ESR elevation at baseline          | 0.69 | 0.32           | 1.50           | 0.35    |
| CRP elevation at baseline          | 0.36 | 0.11           | 1.20           | 0.10    |
| Steroids at baseline               | 1.69 | 0.86           | 3.32           | 0.13    |
| Focal ulcers on baseline endoscopy | 3.54 | 0.93           | 13.44          | 0.06    |
| Hospitalization at diagnosis       | 1.21 | 0.55           | 2.63           | 0.64    |
